# Supplementary material
Source: publisher site journal article supplement (https://static.cambridge.org/content/id/urn:cambridge.org:id:article:S2194588816000130/resource/name/BCA1600013supp.zip)
Supplement: Supplementary file 1 [file BCA1600013supp.zip]

|                                                                    | New water point A      | New water point B         | Your current source                       |
|--------------------------------------------------------------------|------------------------|---------------------------|-------------------------------------------|
| Total time to walk to source, wait, fill container and return home | 10 minutes             | 5 minutes                 | (Time and cost as reported by respondent) |
| Cost per 20L jerrican                                              | 1 Ksh per 20L jerrican | 0.25 Ksh per 20L jerrican |                                           |
