# Supplementary material
Source: publisher site journal article supplement (https://static.cambridge.org/content/id/urn:cambridge.org:id:article:S2194588816000130/resource/name/BCA1600013supp.zip)
Supplement: Supplementary file 3 [file BCA1600013supp.zip]

| Task | Source A               |                   | Source B               |                   |
|------|------------------------|-------------------|------------------------|-------------------|
|      | Price<br>(Ksh per 20L) | Time<br>(minutes) | Price<br>(Ksh per 20L) | Time<br>(minutes) |
| 11   | 0.25                   | 10                | 1                      | 5                 |
| 12   | 0.25                   | 30                | 1                      | 10                |
| 13   | 3                      | 5                 | 1                      | 30                |
| 21   | 0.25                   | 10                | 3                      | 5                 |
| 22   | 0.25                   | 30                | 3                      | 5                 |
| 23   | 3                      | 10                | 0.25                   | 30                |
| 31   | 0.25                   | 30                | 1                      | 5                 |
| 32   | 3                      | 5                 | 1                      | 10                |
| 33   | 3                      | 10                | 1                      | 30                |
| 99   | 1                      | 10                | 0.25                   | 5                 |
