# Supplementary material
Source: publisher site journal article supplement (https://static.cambridge.org/content/id/urn:cambridge.org:id:article:S2194588816000130/resource/name/BCA1600013supp.zip)
Supplement: Supplementary file 5 [file BCA1600013supp.zip]

Archive with 4 entries (4 files):
- Assetindex_facscores.pdf
- choicecard.pdf
- SPexperiment.pdf
- VTTcompare.pdf
