# Supplementary material
Source: publisher site journal article supplement (https://static.cambridge.org/content/id/urn:cambridge.org:id:article:S2194588816000130/resource/name/BCA1600013supp.zip)

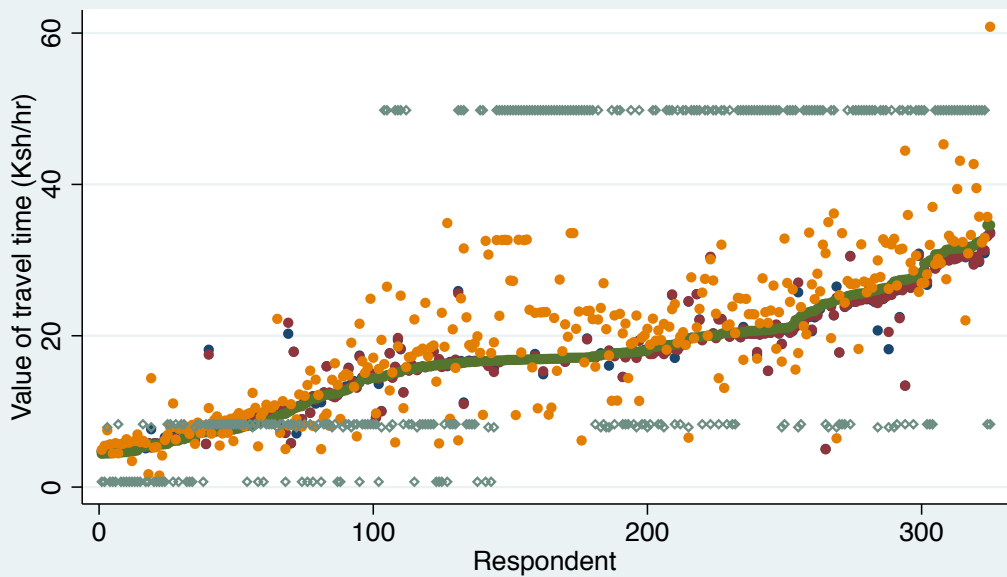

Supplement: Supplementary file 2 [file BCA1600013supp.zip]

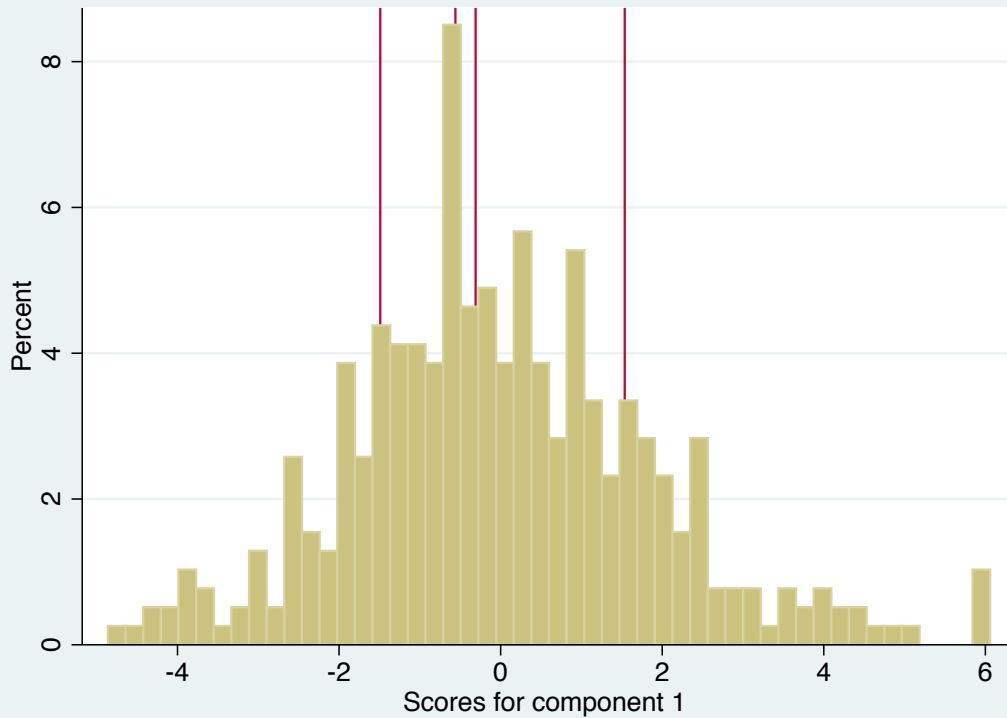

Supplement: Supplementary file 4 [file BCA1600013supp.zip]
